# Supplementary material
Source: PubMed Central journal article supplement (PMC3016896)
Supplement: NIHMS260354-supplement-1.pdf [file NIHMS260354-supplement-1.pdf]

## Supporting information

### Conformational remodeling of femtomolar inhibitor-acetylcholinesterase complexes in the crystalline state

Yves Bourne\*, Zoran Radic, Palmer Taylor, Pascale Marchot\*

yves.bourne@afmb.univ-mrs.fr; pascale.marchot@univmed.fr

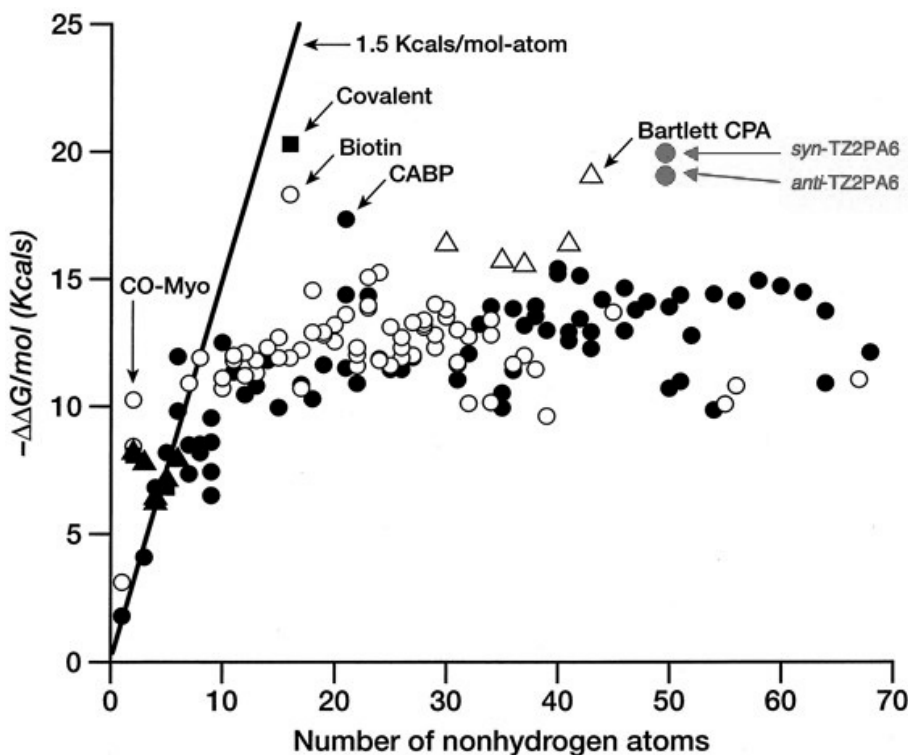

**Figure S1.** Free energy of binding of the TZ2PA6 *syn*1 and *anti*1 regioisomers to the Tyr337Ala mutant of mAChE, relative to that for various ligands and enzyme inhibitors and as a function of the number of nonhydrogen atoms in the ligand. The *syn*1 and *anti*1 regioisomers, of formulae  $C_{42}H_{45}N_8$ , contain 50 nonhydrogen atoms. The line has a slope of 1.5 kcal/mol and an intercept of 0. *Open triangles* stand for metal ions or metalloenzymes, *black triangles* for small anions, *open circles* for natural ligands, and *black circles* for enzyme inhibitors. The positions for some well-known ligands/inhibitors are displayed: carbon oxide (CO-Myo) for myoglobin; biotin for streptavidin; carboxyl arabinitol bisphosphate (CABP) for ribulose disphosphate carboxylase; peptide phosphonates (Bartlett CPA) for carboxypeptidase<sup>38</sup>. “Covalent” (*black square*) could denote 1,1,1-trifluoroacetophenone for AChE.<sup>39</sup> (Based on Fig. 1 in ref<sup>26</sup>, with permission (Copyright 2004, National Academy of Sciences, USA).

## References

- (26) Kuntz, I.D.; Chen, K.; Sharp, K.A.; Kollman, P.A. *Proc. Natl. Acad. Sci. USA* **1999**, *96*, 9997-10002.
- (38) Kaplan, A.P.; Bartlett, P.A. *Biochemistry* **1991**, *30*, 8165-70.
- (39) Nair, H.K.; Lee, K.; Quinn, D.M. *J. Am. Chem. Soc.* **1993**, *115*, 9939-41.
